# Supplementary material for: Biological Properties of a Citral-Enriched Fraction of Citrus limon Essential Oil
Source: PubMed Central journal article supplement (PMC7555671; doi:10.3390/foods9091290), 2020-09-14
Supplement: foods-09-01290-s001.pdf [file foods-09-01290-s001.pdf]

## Supplementary Materials

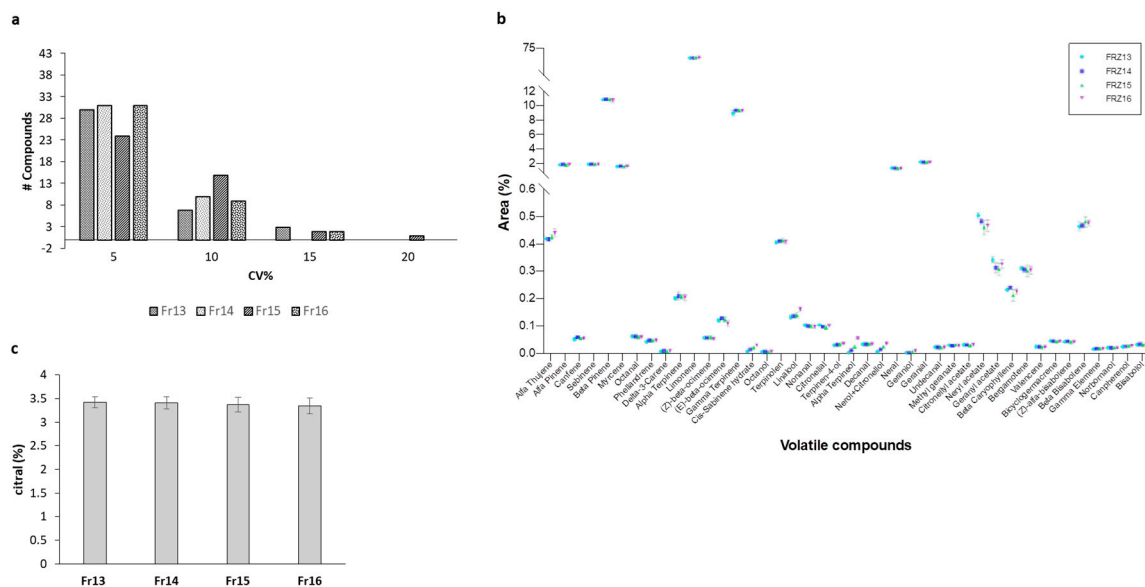

**Figure S1.** Evaluation of the reproducibility of the fractionation process. **(a)** The analysis of the coefficient of variation (CV %) for the three replicates. **(b)** Graph showing the percentage of each compound in the four examined fractions. Each point represents the mean  $\pm$ SD of the three independent replicates of the fractionation process. **(c)** The histogram represents the mean  $\pm$ SD of the percentage of citral in the selected fractions. Values are the mean of three independent replicates of the fractionation process.
